# Supplementary material
Source: MDPI journal article supplement (https://www.mdpi.com/2073-4344/11/12/1468)
Supplement: s1 [file s1]

## Article

# CO<sub>2</sub> Reforming of CH<sub>4</sub> Using Coke Oven Gas over Ni/MgO-Al<sub>2</sub>O<sub>3</sub> Catalysts: Effect of the MgO:Al<sub>2</sub>O<sub>3</sub> Ratio

Ho-Ryong Park <sup>1</sup>, Beom-Jun Kim <sup>1</sup>, Yeol-Lim Lee <sup>1</sup>, Seon-Yong Ahn <sup>1</sup>, Kyoung-Jin Kim <sup>1</sup>, Ga-Ram Hong <sup>1</sup>, Seong-Jin Yun <sup>1</sup>, Byong-Hun Jeon <sup>2</sup>, Jong Wook Bae <sup>3</sup>, and Hyun-Seog Roh <sup>1,\*</sup>

<sup>1</sup> Department of Environmental Engineering, Yonsei University, 1 Yonseidae-gil, Wonju, Gangwon-do 26493, Republic of Korea; phr19@yonsei.ac.kr (H.-R.P.); beomjunkim@yonsei.ac.kr (B.-J.K.); yllee@yonsei.ac.kr (Y.-L.L.); syahn99@yonsei.ac.kr (S.-Y.A.); kyoungjinkim@yonsei.ac.kr (K.-J.K.); hgr0108@yonsei.ac.kr (G.-R.H.); ysj9821@yonsei.ac.kr (S.-J.Y.)

<sup>2</sup> Department of Earth Resources and Environmental Engineering, Hanyang University, Seoul, 04763, Republic of Korea; bhjeon@hanyang.ac.kr (B.-H.J.)

<sup>3</sup> School of Chemical Engineering, Sungkyunkwan University (SKKU), 2066 Seobu-ro, Jangan-gu, Suwon, Gyeonggi-do, 16419, Republic of Korea; finejw@skku.edu (J.W.B.)

\* Correspondence: hsroh@yonsei.ac.kr (H.-S.R.)

## Supplementary Materials:

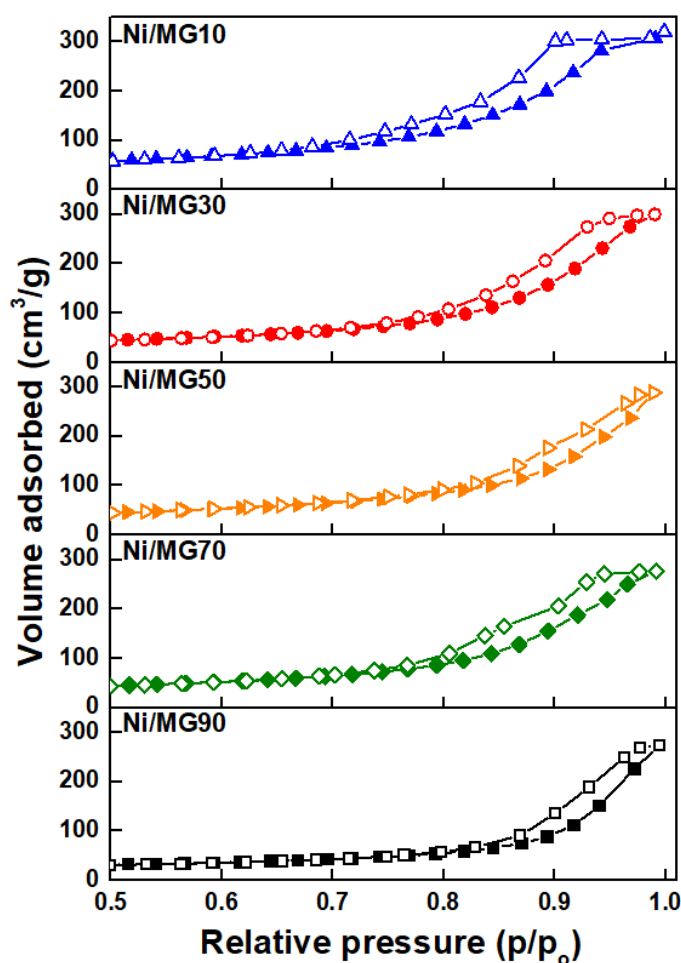

Figure S1. Adsorption/desorption isotherms of Ni/MG catalysts with different MgO:Al<sub>2</sub>O<sub>3</sub> ratios.

**Table S1.** The elemental composition of Ni/MG catalysts determined by ICP-OES.

| Catalysts | Ni (wt.%) | Mg (wt.%) | Al (wt.%) |
|-----------|-----------|-----------|-----------|
| Ni/MG10   | 13.58     | 9.20      | 75.47     |
| Ni/MG30   | 13.32     | 27.97     | 57.70     |
| Ni/MG50   | 13.24     | 44.52     | 42.93     |
| Ni/MG70   | 13.61     | 66.35     | 22.89     |
| Ni/MG90   | 13.43     | 85.01     | 8.42      |
